# Supplementary material for: Loss of Circulating Exosomal miR-92b is a Novel Biomarker of Colorectal Cancer at Early Stage
Source: PubMed Central journal article supplement (PMC6775270; doi:10.7150/ijms.34540), 2019-08-14

**a**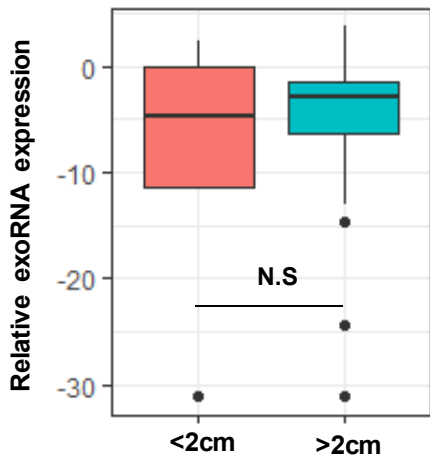**b**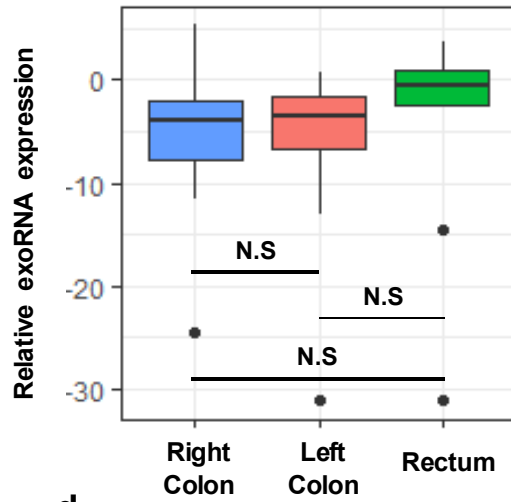**c**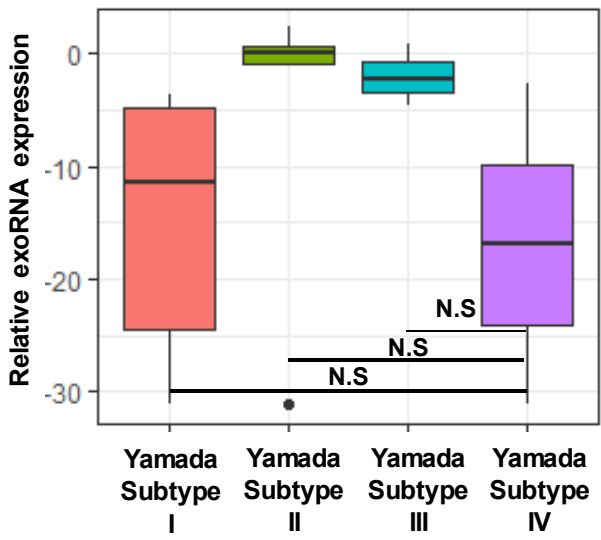**d**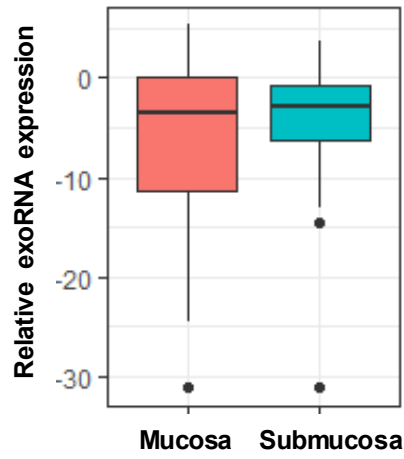**e**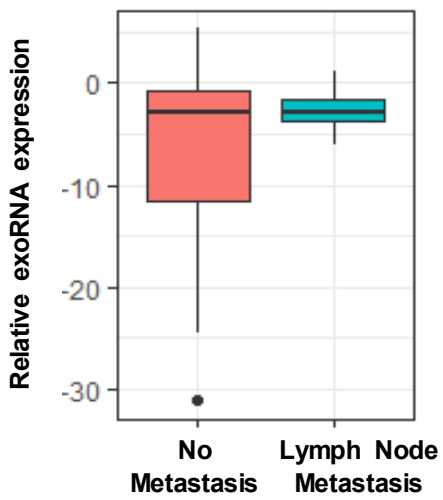**f**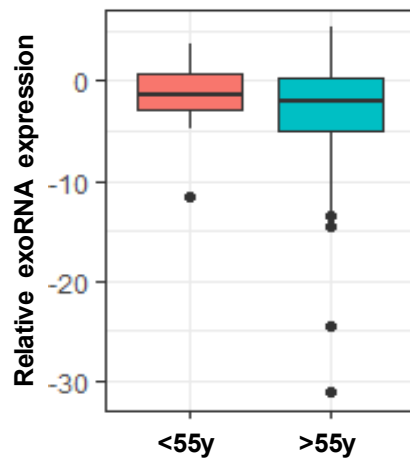**g**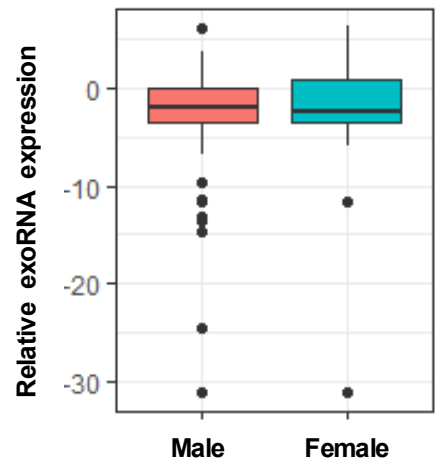

**a**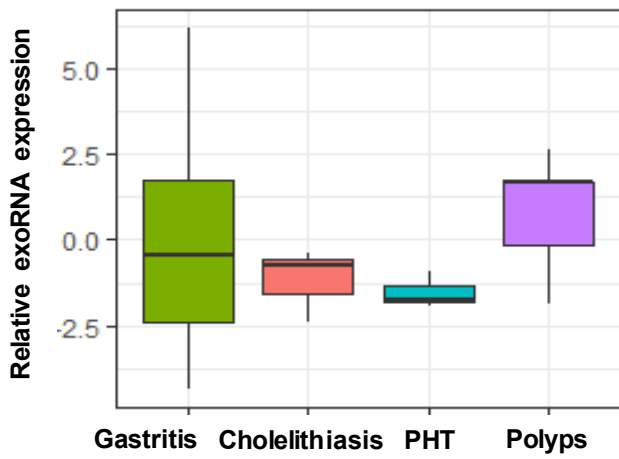**b**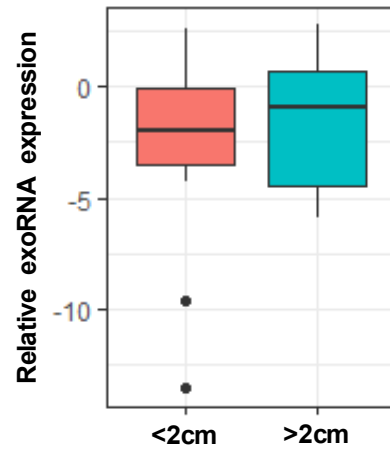**c**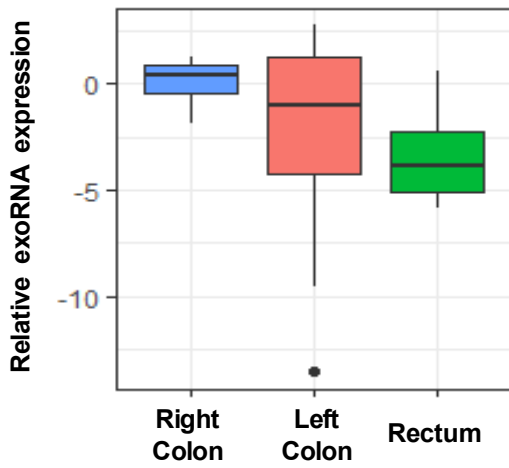**d**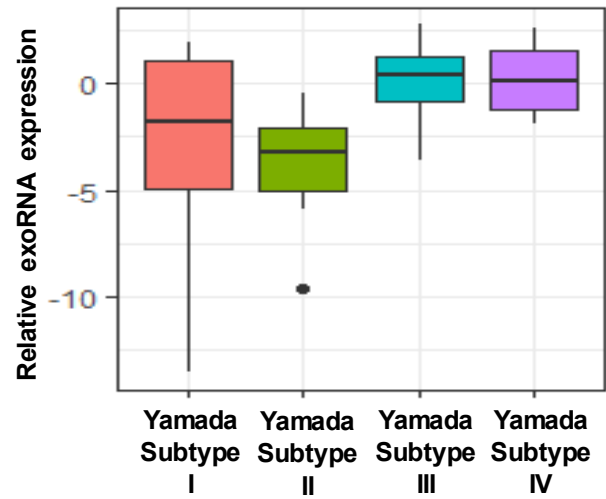**e**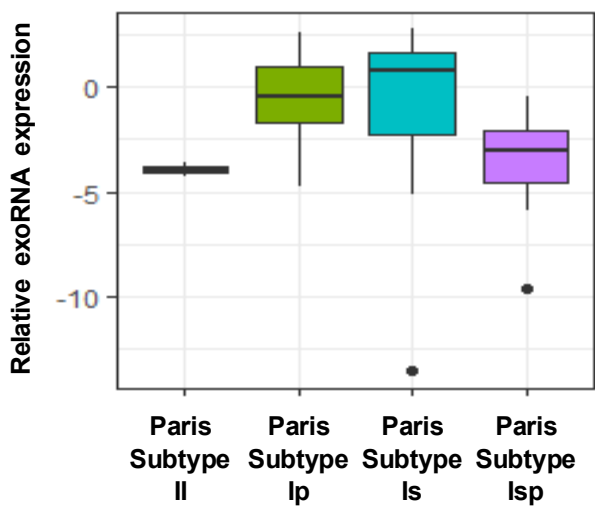

Supplement: ijmsv16p1231s1.pdf [file ijmsv16p1231s1.pdf]
